# Supplementary material for: Effect of the oxidation approach on carbon nanotube surface functional groups and electrooxidative filtration performance
Source: Royal Society of Chemistry journal article supplement (doi:10.1039/c4ta07191c), 2015-01-01
Supplement: c4ta07191c1.pdf [file c4ta07191c1.pdf]

# Effect of Oxidation Approach on Carbon Nanotube Surface Functional Groups and Electrooxidative Filtration Performance

## Supporting Information

*Journal of Materials Chemistry A*

October 10, 2014

Guandao Gao<sup>a,b\*</sup>, Meilan Pan<sup>a</sup> and Chad D. Vecitis<sup>b</sup>

Key Laboratory of Pollution Processes and Environmental Criteria (Ministry of Education),  
Tianjin Key Laboratory of Environmental Remediation and Pollution Control,  
College of Environmental Science and Engineering, Nankai University, Tianjin 300071, China<sup>a</sup>  
School of Engineering and Applied Sciences, Harvard University, Cambridge, MA 02138<sup>b</sup>

E-mail: [gaoguandao@nankai.edu.cn](mailto:gaoguandao@nankai.edu.cn) ( Guandao Gao)

Address: College of Environmental Science and Engineering, Nankai University, Tianjin  
300071, China

**Table S1. Comparison of this study to previous studies on possible reaction sites of CNT.**

| <b>Electrochemical Probes</b>                                                                 | <b>Experiment methods</b> | <b>Anodic performance</b>                                                                                                                                                                                  | <b>Reaction site on CNT</b> | <b>Ref.</b> |
|-----------------------------------------------------------------------------------------------|---------------------------|------------------------------------------------------------------------------------------------------------------------------------------------------------------------------------------------------------|-----------------------------|-------------|
| O <sub>2</sub> , hydrazine, etc.                                                              | CV, TEM                   | Residual iron nanoparticles are responsible for the electrocatalytic oxidation properties                                                                                                                  | Nanoparticles               | 1-3         |
| Fe(CN) <sub>6</sub> <sup>-3/-4</sup> etc.                                                     | CV                        | Defects may play an important role in the electrochemistry of certain species, especially those that go via surface-mediated inner-sphere                                                                  | Defects / oxidation states  | 4, 5        |
| Fe(CN) <sub>6</sub> <sup>-3/-4</sup> , AA, etc.                                               | CV                        | The relative electrosensitivity to the nanotube tip and sidewall and their oxidation states varies with different electrochemical probes                                                                   | Tips / sidewall             | 6           |
| Fe(phen) <sub>3</sub> <sup>2+/3+</sup> , Ru(NH <sub>3</sub> ) <sub>6</sub> <sup>3+</sup> etc. | CV                        | Metallic and semiconducting CNT are sensitive to the redox couple                                                                                                                                          | Conductivity                | 7           |
| Fe(CN) <sub>6</sub> <sup>-3/-4</sup> , AA, phenol, oxalate.                                   | CV, EIS, XPS, IR, TOC     | This paper explored that effect of oxidation approach on carbon nanotube surface functional groups and how the specific CNT surface oxy-functional group affects the efficacy and efficiency of CNT anodes | Functional groups (-OH)     | This paper  |

**CNT Purification.** Briefly, 1 g of as-received CNT was first calcinated in a tube furnace in the presence of O<sub>2</sub> by increasing from room temperature to 400 °C for at a rate of 5 °C per min and holding at 400 °C for 60 min (Thermolyne, 21100) to remove any amorphous or other non-CNT carbon impurities. Then, 0.5 g of calcinated CNT was placed into 0.5 L of concentrated HCl (37%) and heated to 70 °C in a round-bottom flask with a stir bar and a condenser for 12 hours to remove the residual metal catalyst impurities. After acid treatment, the sample was cooled to room temperature and vacuum filtered through a 5-µm PTFE membrane (Omnipore, Millipore) to collect the CNT. The CNT were then washed with MilliQ deionized water (DI) until the filter effluent pH was neutral.

**Figure S1. Images of the Electrochemical Filtration Apparatus.** The whole reaction cell (including the upper cap and bottom cap), anode components (Titanium ring and CNT network with cross-section and aerial images) and cathode (the perforated stainless steel).

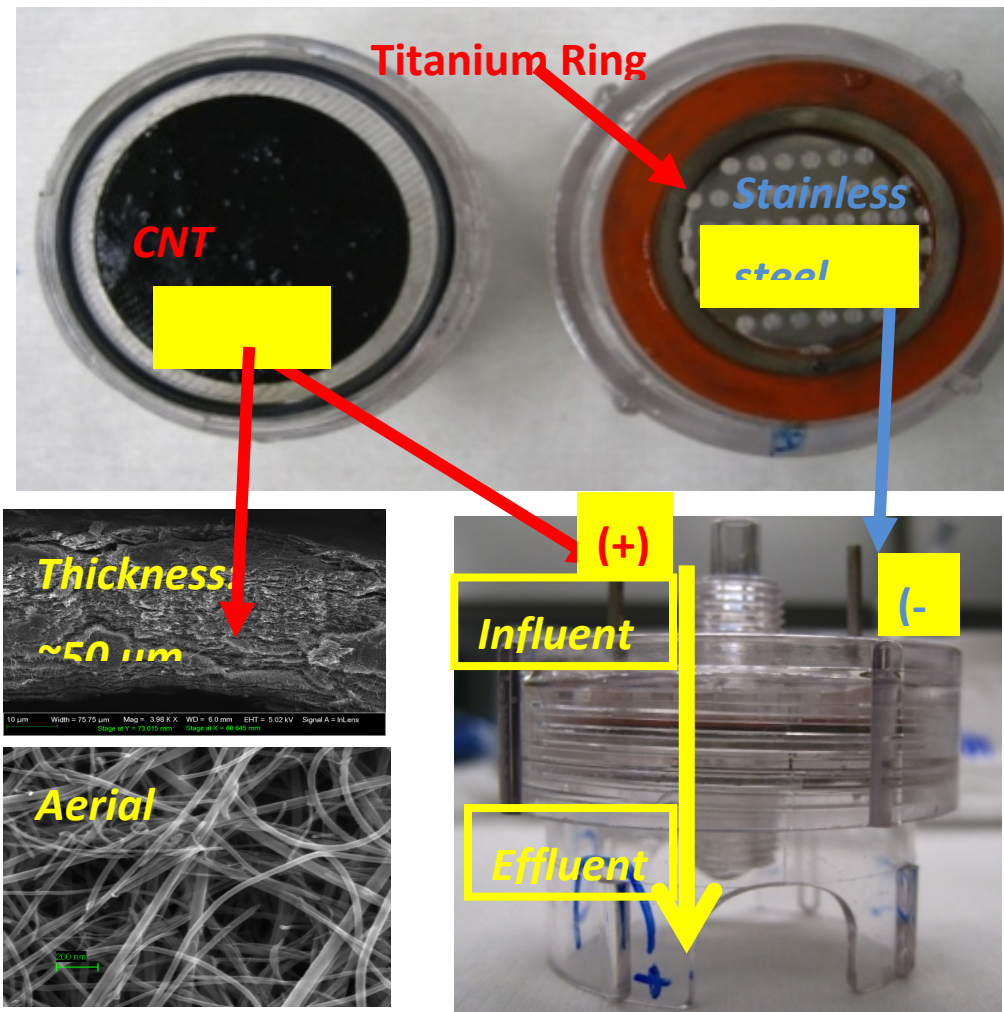

**Figure S2. Images of a representative CNT network.** A) Aerial image of CNT network. Scanning electron micrographs (SEM) B) aerial CNT network image; C) Cross-section CNT network image; D) magnified aerial CNT network image.

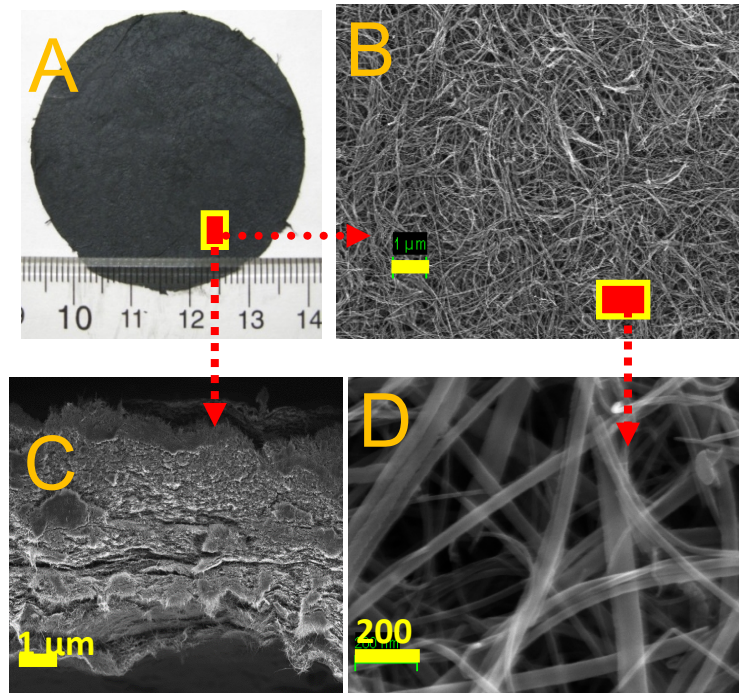

All information of XPS fitting (FWHM, Area under the curve etc.) is presented here.

**XPS of CNT-HCl**

| Name | FWHM  | Raw Area | %At Conc | c/C, o/O      | O/C                |
|------|-------|----------|----------|---------------|--------------------|
| C 1s | 3.328 | 27.8428  | 6.701    | 0.0686        | <b>0.023594079</b> |
| C 1s | 1.125 | 247.937  | 59.465   | 0.6087        |                    |
| C 1s | 3.219 | 131.409  | 31.528   | 0.3227        |                    |
| O 1s | 4.39  | 5.23731  | 0.504    | <b>0.2187</b> |                    |
| O 1s | 2.606 | 18.7218  | 1.801    | <b>0.7813</b> |                    |

**XPS of CNT-EO**

| Name | FWHM  | Raw Area | %At Conc | c/C, o/O        | O/C             |
|------|-------|----------|----------|-----------------|-----------------|
| C 1s | 4.232 | 67.1179  | 7.678    | 0.079663        | <b>0.037549</b> |
| C 1s | 2.815 | 235.803  | 26.897   | 0.27907         |                 |
| C 1s | 1.105 | 542.082  | 61.806   | 0.641267        |                 |
| O 1s | 2.341 | 54.2417  | 2.482    | <b>0.685825</b> |                 |
| O 1s | 1.858 | 24.8869  | 1.137    | <b>0.314175</b> |                 |

**XPS of CNT-HNO<sub>3</sub>**

| Name | FWHM  | Raw Area | %At Conc | c/C, o/O   | O/C            |
|------|-------|----------|----------|------------|----------------|
| C 1s | 4.257 | 40.2416  | 9.94     | 0.103147   | <b>0.03771</b> |
| C 1s | 1.139 | 227.783  | 56.075   | 0.58189    |                |
| C 1s | 3.097 | 123.245  | 30.352   | 0.314963   |                |
| O 1s | 3.022 | 36.7945  | 3.634    | <b>100</b> |                |

**Table S1. BET Surface Area of CNT Samples.**

|                            | <b>CNT-HCl</b> | <b>CNT-EO</b> | <b>CNT-HNO<sub>3</sub></b> |
|----------------------------|----------------|---------------|----------------------------|
| BET<br>(m <sup>2</sup> /g) | 255.8          | 120.7         | 122.1                      |

  

| <b>CNT-HCl</b>                                                                    | <b>CNT-EO</b>                                                                     | <b>CNT-HNO<sub>3</sub></b>                                                         |
|-----------------------------------------------------------------------------------|-----------------------------------------------------------------------------------|------------------------------------------------------------------------------------|
| 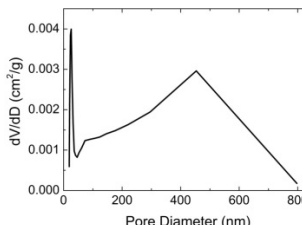 |  |  |

**Figure S3. Time-dependent phenol degradation.**

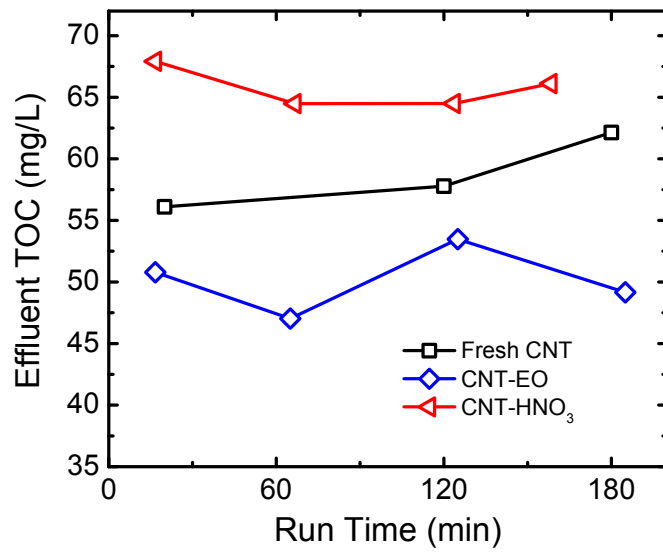



**Figure S4. Intermediates of Phenol Electro-Oxidation Detected by UPLC-MS.**

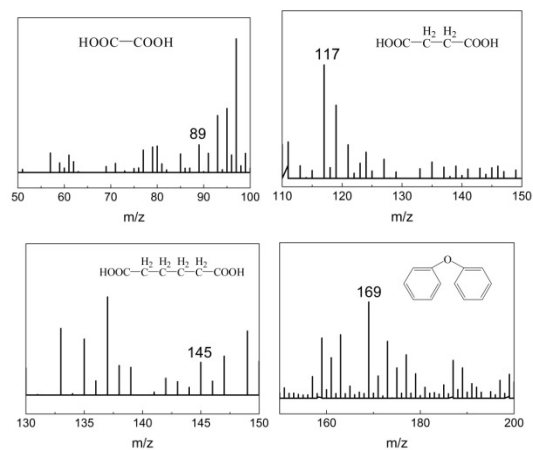

1. Banks CE, Crossley A, Salter C, Wilkins SJ and Compton RG, *Angew. Chem. Int. Ed.*, 2006, **45**, 2533-2537.
2. Dai X, Wildgoose GG and Compton RG, *Analyst (Cambridge UK)*, 2006, **131**, 901-906.
3. Sljukic B, Banks CE and Compton RG, *Nano Lett.*, 2006, **6**, 1556-1558.
4. R. L. McCreery, *Chem. Rev.*, 2008, **108**, 2646-2687.
5. Moore RR, Banks CE and Compton RG, *Anal. Chem. (Wash.)*, 2004, **76**, 2677-2682.
6. K. P. Gong, S. Chakrabarti and L. M. Dai, *Angewandte Chemie International Edition*, 2008, **47**, 5446-5450.
7. Thomas M. Day, Neil R. Wilson and Julie V. Macpherson, *J. Am. Chem. Soc.*, 2004, **126**, 16724–16725.
